# Supplementary material for: Fully synthetic macromolecular prodrug chemotherapeutics with EGFR targeting and controlled camptothecin release kinetics
Source: Royal Society of Chemistry journal article supplement (doi:10.1039/c8py01047a), 2018-01-01
Supplement: c8py01047a1.pdf [file c8py01047a1.pdf]

## Fully synthetic macromolecular prodrug chemotherapeutics with EGFR targeting and controlled camptothecin release kinetics

Hanna Freeman<sup>a</sup>, Selvi Srinivasan<sup>a</sup>, Debobrato Das<sup>a</sup>, Patrick S Stayton<sup>a,\*</sup>, and Anthony J Convertine<sup>a\*</sup>

### Supporting Information

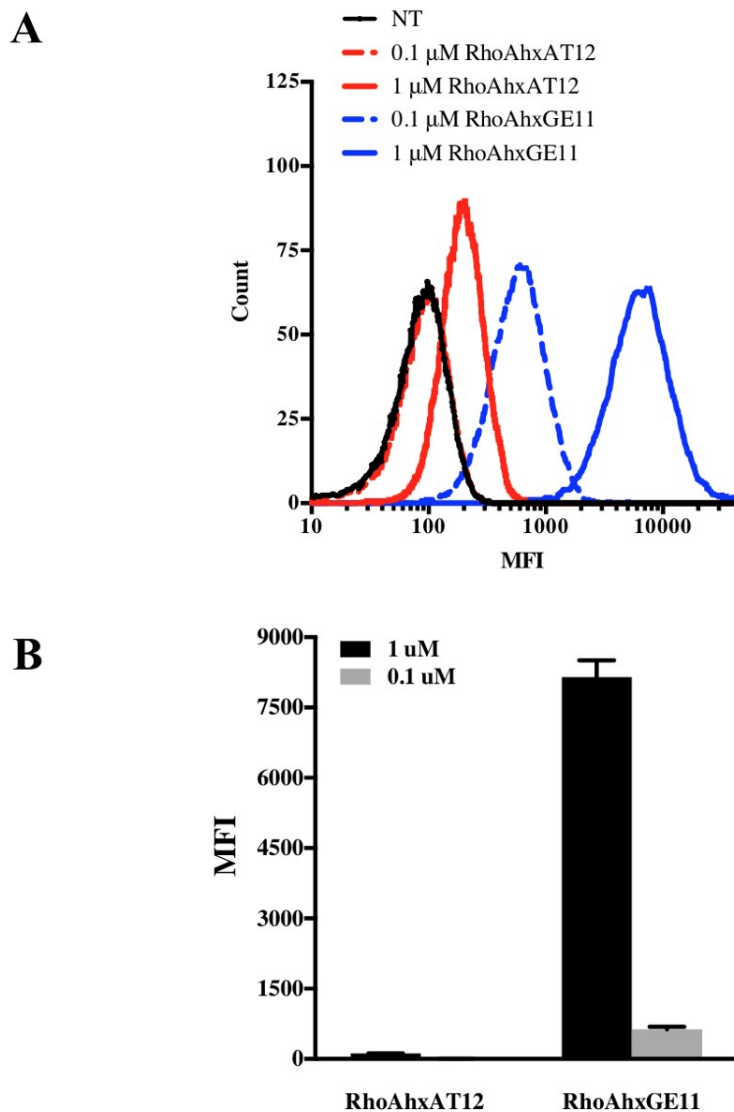

**Figure S1: The GE11 peptide targets SKOV3 ovarian cancer cells.** GE11 was synthesized with a six carbon spacer (aminohexanoic acid (Ahx)) and N-terminal rhodamine B fluorescent label (RhoAhxGE11). As a control, the unrelated peptide AT12 was also synthesized with Ahx and rhodamine B (RhoAhxAT12). SKOV3 cells were incubated RhoAhxGE11 RhoAhxAT12 at concentrations of 0.1  $\mu$ M and 1  $\mu$ M for 30 minutes at 4  $^{\circ}$ C. Cells were then washed, trypsinized,

and analyzed by flow cytometry for peptide binding. At 0.1  $\mu\text{M}$ , RhoAhxGE11 bound to cells at a 158-fold higher level than RhoAhxAT12, whose binding was nearly undetectable. At 10  $\mu\text{M}$ , RhoAhxGE11 binding was 70-fold higher than RhoAhxAT12. These results validate the ability of GE11 to target SKOV3 cells.

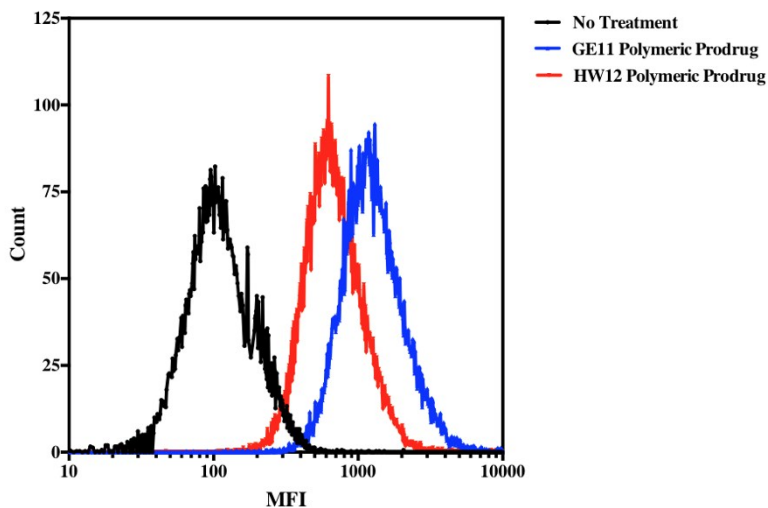

**Figure S2. GE11 enhances SKOV3 targeting of the polymeric camptothecin prodrug.** To measure the targeting effect of GE11 within the context of the diblock polymeric prodrug system, SKOV3 cells were incubated with the fluorescently labeled GE11-targeted prodrug polymer or the HW12 control at a concentration of 1  $\mu\text{M}$  polymer for 15 min at 37  $^{\circ}\text{C}$ . Cells were then washed, trypsinized and polymer binding was measured by flow cytometry. The GE11-targeted polymer bound at approximately 2-fold higher levels than the HW12 polymer. This targeting effect is consistent with the increase in cytotoxic activity observed in Figure X.

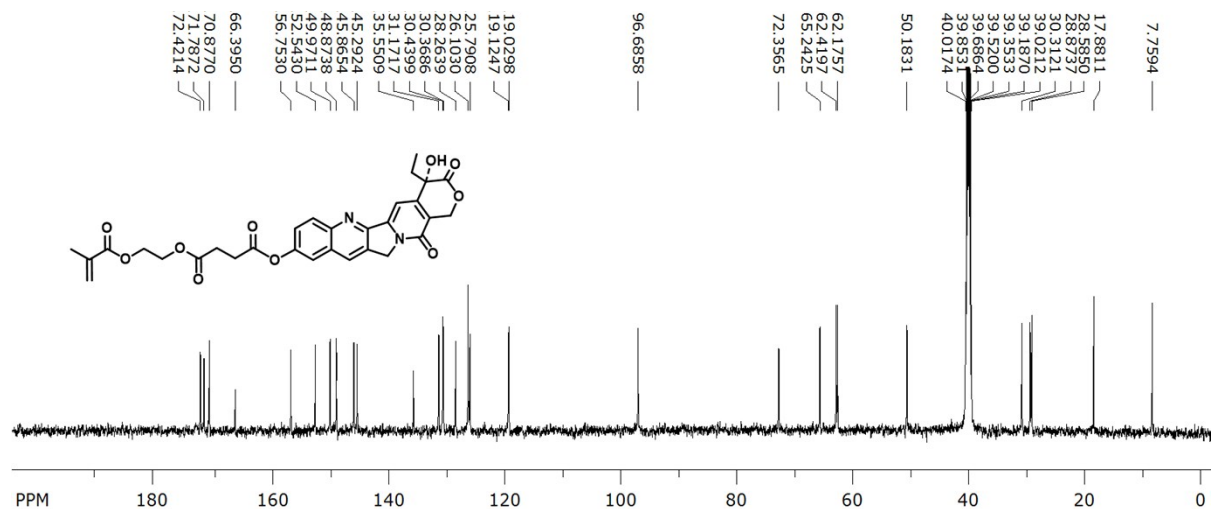

$^{13}\text{C}$  NMR (125MHz,  $\text{DMSO-d}_6$ , ppm):  $\delta$  172.4, 171.8, 170.9, 166.4, 156.8, 152.5, 150.0, 148.9, 145.9, 145.3, 135.6, 131.2, 130.4, 128.3, 126.1, 125.8, 119.1, 119.0, 96.7, 72.4, 65.2, 62.4, 62.2, 50.2, 30.3, 28.9, 28.6, 17.9, 7.6

**Figure S3.  $^{13}\text{C}$  NMR of 10-hydroxyCam-SMA in  $\text{DMSO-d}_6$ .**

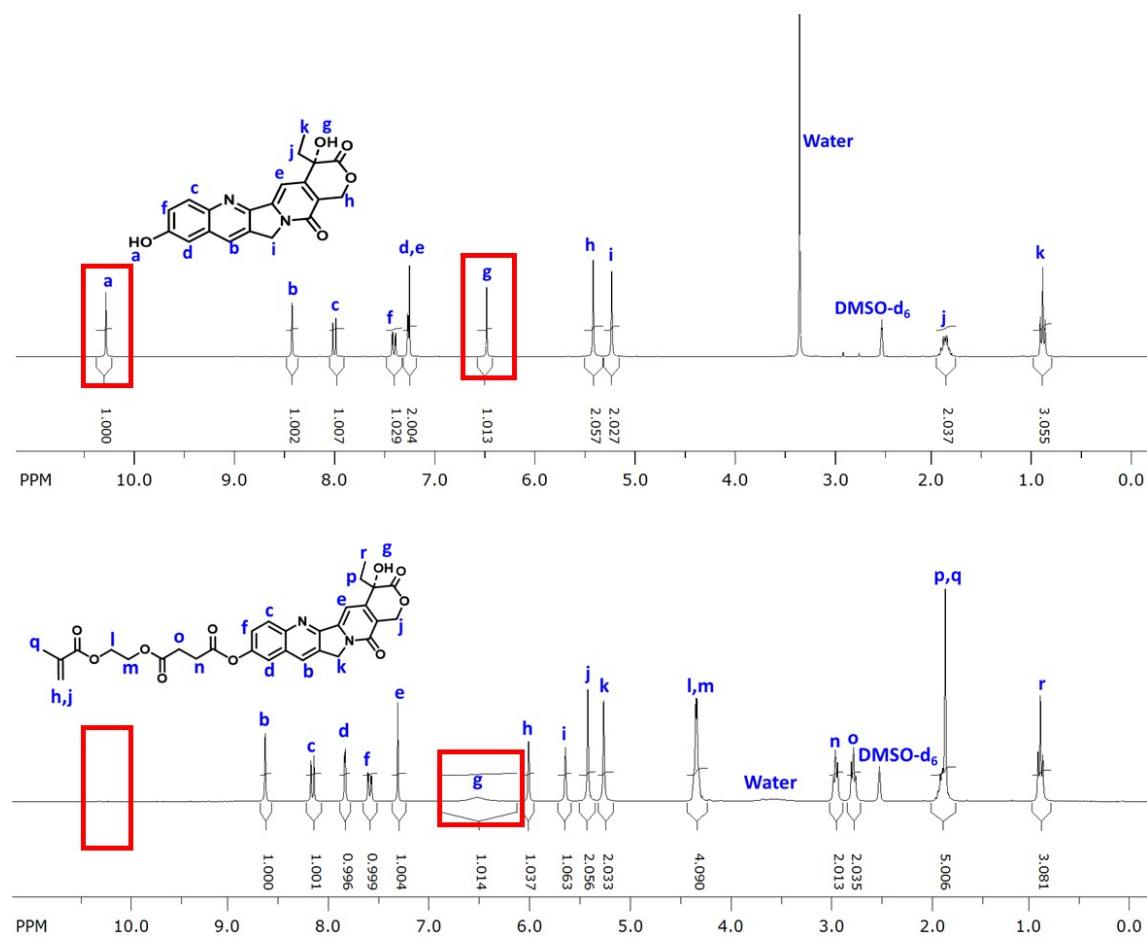

$^1\text{H}$  NMR spectra of 10-Cam (top) and 10-Cam-SMA (bottom) in  $\text{DMSO-d}_6$ .

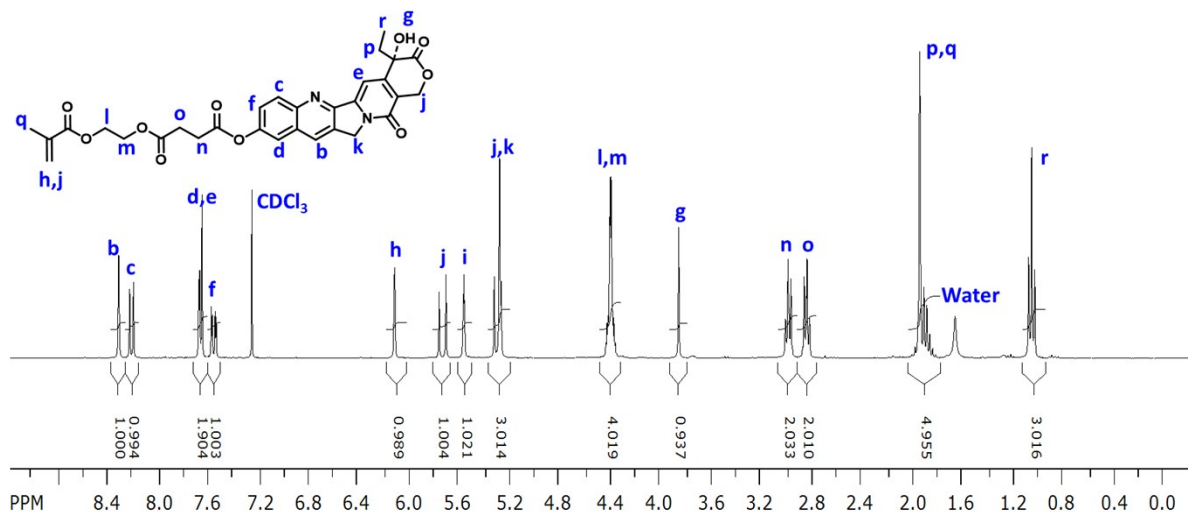

<sup>1</sup>H NMR spectrum of 10-Cam-SMA in CDCl<sub>3</sub>
